# Supplementary material
Source: PubMed Central journal article supplement (PMC2743096)
Supplement: NIHMS137214-supplement-Supp_Info.pdf [file NIHMS137214-supplement-Supp_Info.pdf]

Supplemental Table I: Antigens and HLA association of peptides used to induce influenza and islet antigen specific T cell responses in control and T1D subjects.

| <b>Antigen</b>                                        | <b>Peptide</b>                  | <b>HLA DR<math>\beta</math>1* restriction</b> | <b>Ref.</b> |
|-------------------------------------------------------|---------------------------------|-----------------------------------------------|-------------|
| <b>Influenza specific</b>                             |                                 |                                               |             |
| Hemagglutinin                                         | HA 306-318<br>(PRYVKQNTLKLAT)   | 0401                                          | 32          |
| Matrix protein                                        | MP 60-73<br>(LGFVFTLTVPSEGR)    | 0404                                          | 32          |
| Non-structural protein                                | NS-1 32-45<br>(DRLRRDQRSLRG)    | 0301                                          | 32          |
| <b>Islet specific</b>                                 |                                 |                                               |             |
| Glutamic acid decarboxylase                           | GAD 555-567<br>(NFFRMVISNPAAT)  | 0401, 0404                                    | 23, 28-30   |
| Glucose-6-phosphate catalytic subunit-related protein | IGRP 247-259<br>(DWIHIDTTPFAGL) | 0401                                          | 31          |
|                                                       | IGRP 226-238<br>(RVLNIDLLWSVPI) | 0301                                          | 31          |

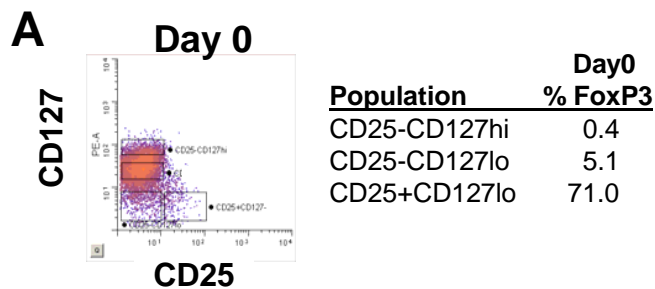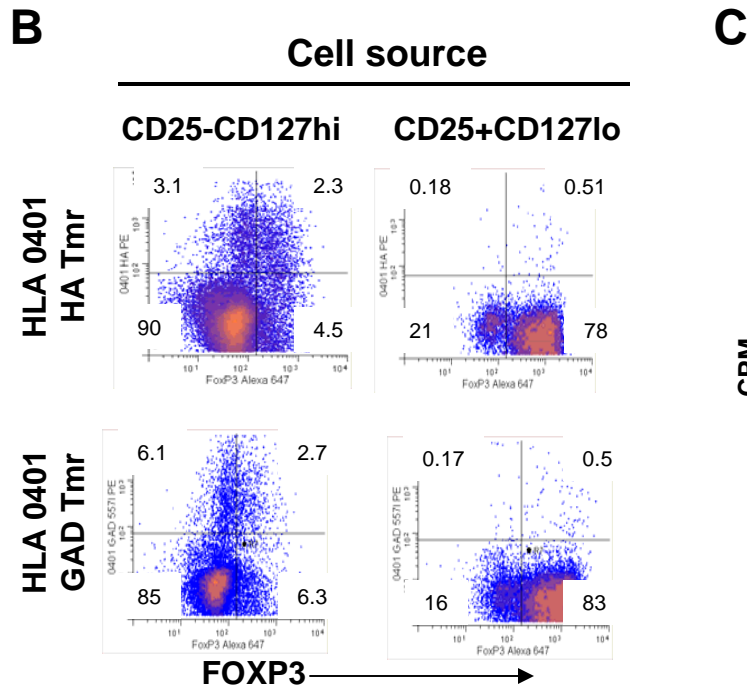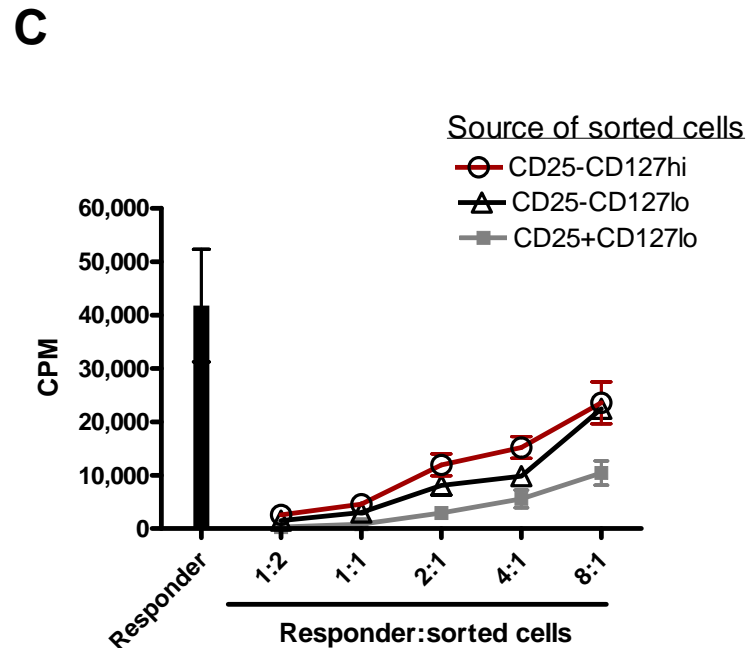

**Supplemental Figure 1: A.** Peripheral CD4<sup>+</sup> T cells were isolated as described in Materials and Methods and stained with CD25, CD127 and FOXP3 antibodies. **B.** CD25-CD127hi and CD25+CD127lo populations were sorted and activated with irradiated APC and 10  $\mu$ g/ml HA or GAD peptide. Fourteen days following activation, cells were assayed by flow cytometry for expression of CD4, CD25, Tmr, and FOXP3. Tmr and FOXP3 expression on each sorted population is shown for one representative sample of three. **C.** CD25-CD127hi, CD25-CD127lo and CD25+CD127lo were activated with irradiated APC and 5 $\mu$ g/ml soluble  $\alpha$ CD3. At the end of culture, CD25hi T cells were sorted and placed in a suppression assay with autologous CD4+CD25- T cells as described previously (37).

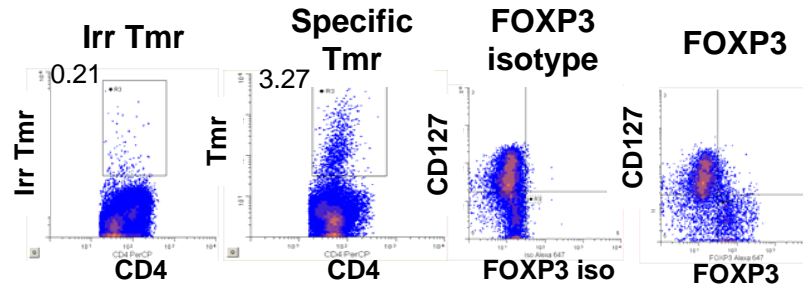

**Supplemental Figure 2:** Tmr staining controls utilized Tmr of the matched HLA Class II type bound to an irrelevant peptide. Positive Tmr staining was determined to be responses at least 4-fold greater than control Tmr stains. FOXP3 isotype in conjunction with CD25 and CD127 expression on activated T cells were used as FOXP3 staining controls.
